# Supplementary material for: Molecular Phylogeny of Holarctic Aeshnidae with a Focus on the West Palaearctic and Some Remarks on Its Genera Worldwide (Aeshnidae, Odonata)
Source: MDPI journal article supplement (doi:10.3390/d15090950), 2023-08-23
Supplement: s1 [file s1]

**Table S1.** Detailed information about Aeshnidae investigated in this study.

| Species                                       | Latitude | Longitude | Country    | Region                                                           | Collector / Reference                          | PCR COI | PCR IST | GenBank COI | GenBank ITS | DNA number |
|-----------------------------------------------|----------|-----------|------------|------------------------------------------------------------------|------------------------------------------------|---------|---------|-------------|-------------|------------|
| <i>Aeschnophlebia longistigma</i> Selys, 1883 |          |           | Korea      |                                                                  | [18]                                           |         |         | KF257055    | no data     |            |
| <i>Aeschnophlebia longistigma</i>             |          |           | Japan      |                                                                  | [19]                                           |         |         | no data     | AB706669    |            |
| <i>Aeschnophlebia longistigma</i>             | 42.4700  | 130.6400  | Russia     | Primorye, Lake Lotos                                             | O. Kosterin leg.                               | 16902   | 17049   | OR130000    | OR133899    | D507       |
| <i>Aeschnophlebia longistigma</i>             | 44.5100  | 132.7000  | Russia     | Primorye, Khasan District, Prokhory Village                      | O. Kosterin leg.                               | 17002   | 17050   | OR130001    | OR133898    | D508       |
| <i>Aeschnophlebia anisoptera</i> Selys, 1883  |          |           | Japan      |                                                                  | [19]                                           |         |         | no data     | AB706668    |            |
| <i>Aeshna affinis</i> Vander Linden, 1820     |          |           | Italy      |                                                                  | [20]                                           |         |         | MT298234    | no data     |            |
| <i>Aeshna affinis</i>                         |          |           | Azerbaijan | Yardimli, Shefekli Village                                       | N. Snegovaya leg.                              | 16935   | 17082   | OR130002    | OR133867    | D540       |
| <i>Aeshna affinis</i>                         |          |           | Azerbaijan | Shabran District                                                 | N. Snegovaya leg.                              | 16938   | 17085   | OR130003    | OR133869    | D543       |
| <i>Aeshna affinis</i>                         |          |           | Azerbaijan | Balaken, Gabagchol                                               | N. Snegovaya leg.                              | 16941   | 17088   | OR130004    | OR133868    | D546       |
| <i>Aeshna affinis</i>                         |          |           | Germany    |                                                                  | [15]                                           |         |         | HM422047    | no data     |            |
| <i>Aeshna caerulea</i> (Ström, 1783)          |          |           | Italy      |                                                                  | [20]                                           |         |         | MT298235    | no data     |            |
| <i>Aeshna caerulea</i>                        |          |           | Austria    |                                                                  | [16]                                           |         |         | MW490272    | no data     |            |
| <i>Aeshna caerulea</i>                        |          |           | Sweden     | Lapland                                                          | T. Schneider leg.                              | 16021   | 16087   | OR130006    | OR133866    | D419       |
| <i>Aeshna caerulea</i>                        |          |           | France     |                                                                  | [15]                                           |         |         | no data     | MN656996    |            |
| <i>Aeshna caerulea</i>                        | 52.6400  | 96.8000   | Russia     | Tuva Republic, Todzha District, Lake Ottug-Khol'                 | O. Kosterin leg.                               | 17281   | failed  | OR130005    | no data     | D519       |
| <i>Aeshna canadensis</i> Walker, 1908         |          |           | Canada     |                                                                  | [15]                                           |         |         | HM413507    | no data     |            |
| <i>Aeshna canadensis</i>                      |          |           | Canada     |                                                                  | [15]                                           |         |         | JF839358    | no data     |            |
| <i>Aeshna constricta</i> Say, 1840            |          |           | Canada     |                                                                  | [15]                                           |         |         | KM528410    | no data     |            |
| <i>Aeshna constricta</i>                      |          |           | Canada     |                                                                  | [15]                                           |         |         | KM528706    | no data     |            |
| <i>Aeshna crenata</i> Hagen, 1856             |          |           | Finland    |                                                                  | A. Schröter leg., Senckenberg Museum Frankfurt | 16894   | 17041   | OR130008    | OR133857    | D499       |
| <i>Aeshna crenata</i>                         |          |           | Finland    |                                                                  | A. Schröter leg., Senckenberg Museum Frankfurt | failed  | 17035   | no data     | OR133853    | D493       |
| <i>Aeshna crenata</i>                         | 54.8200  | 69.7800   | Russia     | S Ural, Bashkortostan, Uchaly District, at Muldashevo Village    | O. Kosterin leg.                               | 16907   | 17054   | OR130011    | OR133856    | D512       |
| <i>Aeshna crenata</i>                         | 52.6000  | 96.8000   | Russia     | Tuva, Todzha District, Lake Saylyg-Khol'                         | O. Kosterin leg.                               | 16906   | 17053   | OR130010    | OR133859    | D511       |
| <i>Aeshna crenata</i>                         | 58.9900  | 126.2449  | Russia     | Yakutia, Tommot Town env.                                        | O. Kosterin leg.                               | 16908   | 17055   | OR130012    | OR133854    | D513       |
| <i>Aeshna crenata</i>                         | 45.0600  | 131.9900  | Russia     | Primorye, Khanka District, Platono-Aleksandrovskaia Village env. | O. Kosterin leg.                               | 16905   | 17052   | OR130009    | OR133858    | D510       |
| <i>Aeshna crenata</i>                         | 53.3040  | 157.4730  | Russia     | Kamchatka, Malki Village                                         | O. Kosterin leg.                               | failed  | 17076   | no data     | OR133855    | D534       |

|                                        | env.        |                                                |                   |       |       |          |          |          |  |
|----------------------------------------|-------------|------------------------------------------------|-------------------|-------|-------|----------|----------|----------|--|
| <i>Aeshna crenata</i>                  | Korea       |                                                | [18]              |       |       |          | KF257093 | no data  |  |
| <i>Aeshna crenata</i>                  | Japan       |                                                | [19]              |       |       |          | no data  | AB706671 |  |
| <i>Aeshna crenata</i>                  | Russia      |                                                | [19]              |       |       |          | no data  | AB706672 |  |
| <i>Aeshna cyanea</i> (Müller, 1764)    | France      |                                                | [16]              |       |       |          | MW490109 | no data  |  |
| <i>Aeshna cyanea</i>                   | Italy       |                                                | [20]              |       |       |          | MT298236 | no data  |  |
| <i>Aeshna cyanea</i>                   | Azerbaijan  | Siyazan, near Galaalty                         | N. Snegovaya leg. | 16937 | 17084 | OR130013 | OR133832 | D542     |  |
| <i>Aeshna cyanea</i>                   | Azerbaijan  | Isailli, Garanokhur Lake                       | N. Snegovaya leg. | 16939 | 17086 | OR130014 | OR133833 | D544     |  |
| <i>Aeshna cyanea</i>                   | Switzerland |                                                | [15]              |       |       |          | MN454844 | no data  |  |
| <i>Aeshna cyanea</i>                   | Italy       |                                                | [14]              |       |       |          | KU180305 | KU180377 |  |
| <i>Aeshna cyanea</i>                   | Germany     |                                                | [14]              |       |       |          | KU180307 | KU180376 |  |
| <i>Aeshna cyanea</i>                   | Poland      |                                                | [14]              |       |       |          | KU180308 | KU180379 |  |
| <i>Aeshna cyanea</i>                   | Algerie     |                                                | [14]              |       |       |          | KU180311 | KU180374 |  |
| <i>Aeshna cyanea</i>                   | Tunisia     |                                                | [14]              |       |       |          | KU180310 | KU180385 |  |
| <i>Aeshna cyanea</i>                   | Tunisia     |                                                | [14]              |       |       |          | KU180320 | KU180386 |  |
| <i>Aeshna cyanea</i>                   | Poland      |                                                | [14]              |       |       |          | KU180306 | KU180378 |  |
| <i>Aeshna cyanea</i>                   | Spain       |                                                | [14]              |       |       |          | KU180309 | KU180384 |  |
| <i>Aeshna cyanea</i>                   | Armenia     |                                                | [14]              |       |       |          | KU180316 | KU180370 |  |
| <i>Aeshna cyanea</i>                   | Russia      | Krasnodar Krai,<br>Mostovskiy District, Psebay | [14]              |       |       |          | KU180312 | KU180380 |  |
| <i>Aeshna cyanea</i>                   | Armenia     |                                                | [14]              |       |       |          | KU180319 | KU180371 |  |
| <i>Aeshna cyanea</i>                   | Russia      | Krasnodar Krai,<br>Mostovskiy District, Psebay | [14]              |       |       |          | KU180318 | KU180383 |  |
| <i>Aeshna cyanea</i>                   | Russia      | Krasnodar Krai,<br>Mostovskiy District, Psebay | [14]              |       |       |          | KU180317 | KU180382 |  |
| <i>Aeshna cyanea</i>                   | Russia      | Krasnodar Krai,<br>Mostovskiy District, Psebay | [14]              |       |       |          | KU180313 | KU180381 |  |
| <i>Aeshna cyanea</i>                   | Georgia     |                                                | [14]              |       |       |          | KU180314 | KU180375 |  |
| <i>Aeshna cyanea</i>                   | Armenia     |                                                | [14]              |       |       |          | KU180315 | KU180369 |  |
| <i>Aeshna cyanea</i>                   | Armenia     |                                                | [14]              |       |       |          | KU180321 | KU180372 |  |
| <i>Aeshna cyanea</i>                   | Belgium     |                                                | [14]              |       |       |          | KU180304 | KU180373 |  |
| <i>Aeshna eremita</i> Scudder, 1866    | Canada      |                                                | [15]              |       |       |          | HM381222 | no data  |  |
| <i>Aeshna eremita</i>                  | USA         | Alaska                                         | [21]              |       |       |          | KU873985 | no data  |  |
| <i>Aeshna grandis</i> (Linnaeus, 1758) | Germany     |                                                | [14]              |       |       |          | KU180299 | KU180363 |  |
| <i>Aeshna grandis</i>                  | Italy       |                                                | [20]              |       |       |          | MT298237 | no data  |  |
| <i>Aeshna interrupta</i> Walker, 1908  | USA         | Alaska                                         | [21]              |       |       |          | KU873988 | no data  |  |
| <i>Aeshna interrupta</i>               | USA         | Alaska                                         | [21]              |       |       |          | KU873987 | no data  |  |
| <i>Aeshna interrupta</i>               | Canada      |                                                | [15]              |       |       |          | HM381232 | no data  |  |
| <i>Aeshna isoceles</i> (Müller, 1767)  | Italy       |                                                | [20]              |       |       |          | MT298239 | no data  |  |
| <i>Aeshna isoceles</i>                 | Italy       |                                                | [20]              |       |       |          | MT298240 | no data  |  |
| <i>Aeshna isoceles</i>                 | Lebanon     | Bared Brook                                    | T. Schneider leg. | 16261 | 16284 | OR130019 | OR133827 | D446     |  |
| <i>Aeshna isoceles</i>                 | Germany     | Brandenburg                                    | T. Schneider leg. | 16004 | 16041 | OR130018 | OR133825 | D421     |  |
| <i>Aeshna isoceles</i>                 | Morocco     | Quiouane Middle Atlas                          | T. Schneider leg. | 16260 | 16267 | OR130020 | OR133830 | D445     |  |
| <i>Aeshna isoceles</i>                 | Azerbaijan  | Zakatala, Geratap                              | N. Snegovaya leg. | 16992 | 17087 | OR130017 | OR133826 | D545     |  |

|                                       |         |          |                        |                                                     |                    |       |       |          |          |      |
|---------------------------------------|---------|----------|------------------------|-----------------------------------------------------|--------------------|-------|-------|----------|----------|------|
| <i>Aeshna isoceles</i>                |         |          | Azerbaijan             | Lenkoran, Azfilial Settlement                       | N. Snegovaya leg.  | 16943 | 17090 | OR130016 | OR133829 | D548 |
| <i>Aeshna isoceles</i>                |         |          | Azerbaijan             | Agstafa, Poylu Village, Kura River                  | N. Snegovaya leg.  | 16942 | 17089 | OR130015 | OR133828 | D547 |
| <i>Aeshna isoceles</i>                |         |          | France                 |                                                     | [15]               |       |       | no data  | FN356032 |      |
| <i>Aeshna juncea</i> (Linnaeus, 1758) | 58.5000 | 125.5067 | Russia                 | Yakutia, Aldan District, Leb-edinyy Town            | O. Kosterin leg.   | 16921 | 17068 | OR130030 | OR133838 | D526 |
| <i>Aeshna juncea</i>                  | 56.4500 | 160.9500 | Russia                 | Kamchatka, at Klyuchi Village                       | O. Kosterin leg.   | 16931 | 17078 | OR130025 | OR133843 | D536 |
| <i>Aeshna juncea</i>                  | 42.4600 | 130.6400 | Russia                 | Primorye, Lake Lotos                                | O. Kosterin leg.   | 16922 | 17069 | OR130027 | OR133839 | D527 |
| <i>Aeshna juncea</i>                  | 43.3400 | 41.6740  | Russia                 | N Caucasus, Karachay-Cherkes Republic, Dombay env.  | O. Kosterin leg.   | 16932 | 17079 | OR130026 | OR133844 | D537 |
| <i>Aeshna juncea</i>                  | 53.3400 | 57.7900  | Russia                 | S Ural, Bashkortostan, Sargaya Village env.         | O. Kosterin leg.   | 16917 | 17064 | OR130028 | OR133840 | D522 |
| <i>Aeshna juncea</i>                  | 41.8000 | 47.4100  | Russia                 | Dagestan, Agul District, Lake Debrishara            | O. Kosterin leg.   | 16933 | 17080 | OR130024 | OR133845 | D538 |
| <i>Aeshna juncea</i>                  | 54.1500 | 83.6101  | Russia                 | W Siberia, Ordynskoe District, Spirino Village env. | O. Kosterin leg.   | 16918 | 17065 | OR130029 | OR133841 | D523 |
| <i>Aeshna juncea</i>                  |         |          | Italy                  |                                                     | [20]               |       |       | MT298245 | no data  |      |
| <i>Aeshna juncea</i>                  |         |          | Italy                  |                                                     | [20]               |       |       | MT298244 | no data  |      |
| <i>Aeshna juncea</i>                  |         |          | Italy                  |                                                     | [20]               |       |       | MT298243 | no data  |      |
| <i>Aeshna juncea</i>                  |         |          | Armenia                |                                                     | V. Ananian leg.    | 15037 | 15054 | OR130021 | OR133846 | D363 |
| <i>Aeshna juncea</i>                  |         |          | Pakistan               | Hindu Kush                                          | T. Schneider leg.  | 16947 | 17094 | OR130023 | OR133842 | D552 |
| <i>Aeshna juncea</i>                  |         |          | Georgia                | Lesser Caucasus                                     | T. Schneider leg.  | 16005 | 16040 | OR130022 | OR133847 | D420 |
| <i>Aeshna juncea</i>                  |         |          | Germany                |                                                     | [14]               |       |       | KU180297 | KU180364 |      |
| <i>Aeshna juncea</i>                  |         |          | Canada                 |                                                     | [15]               |       |       | JF839255 | no data  |      |
| <i>Aeshna juncea</i>                  |         |          | Canada                 |                                                     | [22]               |       |       | KR143341 | no data  |      |
| <i>Aeshna juncea</i>                  |         |          | Japan                  |                                                     | [19]               |       |       | no data  | AB706686 |      |
| <i>Aeshna juncea</i>                  |         |          | Russia                 |                                                     | [19]               |       |       | no data  | AB706688 |      |
| <i>Aeshna juncea</i>                  |         |          | Russia                 | Buryatia                                            | [19]               |       |       | no data  | AB711414 |      |
| <i>Aeshna juncea</i>                  |         |          | South Korea            |                                                     | [19]               |       |       | no data  | AB711415 |      |
| <i>Aeshna mixta</i> Latreille, 1805   |         |          | Austria                |                                                     | [17]               |       |       | MW208418 | no data  |      |
| <i>Aeshna mixta</i>                   |         |          | Montenegro             |                                                     | [17]               |       |       | MW208417 | no data  |      |
| <i>Aeshna mixta</i>                   |         |          | Austria                |                                                     | [17]               |       |       | MW208419 | no data  |      |
| <i>Aeshna mixta</i>                   |         |          | Bosnia and Herzegovina |                                                     | [17]               |       |       | MW208416 | no data  |      |
| <i>Aeshna mixta</i>                   |         |          | Montenegro             |                                                     | [20]               |       |       | MT298246 | no data  |      |
| <i>Aeshna mixta</i>                   |         |          | Azerbaijan             | Kedabek, Novoivanovka Village                       | N. Snegovaya leg.  | 16934 | 17081 | OR130031 | OR133863 | D539 |
| <i>Aeshna mixta</i>                   |         |          | Azerbaijan             | Yardimli, Avash Village                             | N. Snegovaya leg.  | 16936 | 17083 | OR130032 | OR133864 | D541 |
| <i>Aeshna mixta</i>                   |         |          | Greece                 |                                                     | D.A.L. Davies leg. | 16158 | 16167 | OR130033 | OR133865 | D441 |
| <i>Aeshna mixta</i>                   | 55.6960 | 37.5200  | Russia                 | Moskow                                              | [23]               |       |       | OM089772 | no data  |      |
| <i>Aeshna palmata</i> Hagen, 1856     |         |          | Canada                 |                                                     | [15]               |       |       | JF839302 | no data  |      |

|                                                |         |          |             |                                                          |                                                      |        |       |          |          |      |
|------------------------------------------------|---------|----------|-------------|----------------------------------------------------------|------------------------------------------------------|--------|-------|----------|----------|------|
| <i>Aeshna palmata</i>                          |         |          | Canada      |                                                          | [15]                                                 |        |       | JN294467 | no data  |      |
| <i>Aeshna palmata</i>                          |         |          | Canada      |                                                          | [15]                                                 |        |       | JF839296 | no data  |      |
| <i>Aeshna petalura</i> Martin, 1908            |         |          | Taiwan      | Yilan Co. SanXing Pond                                   | Fang-Shuo Hu leg.                                    | 16320  | 16359 | OR130034 | OR133834 | D456 |
| <i>Aeshna petalura</i>                         |         |          | Taiwan      | Yilan Co. SanXing Pond                                   | Fang-Shuo Hu leg.                                    | 16325  | 16364 | OR130035 | OR133835 | D461 |
| <i>Aeshna septentrionalis</i> Burmeister, 1839 |         |          | Canada      |                                                          | [15]                                                 |        |       | GU714053 | no data  |      |
| <i>Aeshna septentrionalis</i>                  |         |          | Canada      |                                                          | [15]                                                 |        |       | JF839362 | no data  |      |
| <i>Aeshna serrata</i> Hagen, 1856              |         |          | Finland     |                                                          | A. Schröter leg.,<br>Senckenberg<br>Museum Frankfurt | 16889  | 17036 | OR130036 | OR133851 | D494 |
| <i>Aeshna serrata</i>                          | 54.8600 | 83.0740  | Russia      | W Siberia, Novosibirsk                                   | O. Kosterin leg.                                     | 16909  | 17056 | OR130039 | OR133850 | D514 |
| <i>Aeshna serrata</i>                          | 54.1400 | 61.2900  | Russia      | S Ural, Chelyabinsk Prov-<br>ince, Troitsk District      | O. Kosterin leg.                                     | 16910  | 17057 | OR130038 | OR133848 | D515 |
| <i>Aeshna serrata</i>                          | 56.4500 | 160.9500 | Russia      | Kamchatka, at Klyuchi Vil-<br>lage                       | O. Kosterin leg.                                     | 16930  | 17077 | OR130037 | OR133849 | D535 |
| <i>Aeshna serrata</i>                          |         |          | Russia      |                                                          | [19]                                                 |        |       | no data  | AB706698 |      |
| <i>Aeshna serrata</i>                          |         |          | Russia      |                                                          | [19]                                                 |        |       | no data  | AB706699 |      |
| <i>Aeshna sitchensis</i> Hagen, 1861           |         |          | Canada      |                                                          | [15]                                                 |        |       | HM413523 | no data  |      |
| <i>Aeshna sitchensis</i>                       |         |          | Canada      |                                                          | [22]                                                 |        |       | KR143430 | no data  |      |
| <i>Aeshna soneharai</i> (Asahina, 1988)        | 55.5400 | 60.5800  | Russia      | S Ural, Lake Bol'shaya<br>Akulya                         | O. Kosterin leg.                                     | 16925  | 17072 | OR130041 | OR133860 | D530 |
| <i>Aeshna soneharai</i>                        | 55.7000 | 37.5200  | Russia      | Moscow                                                   | V. Onishko leg.                                      | 16926  | 17073 | OR130040 | OR133861 | D531 |
| <i>Aeshna soneharai</i>                        | 54.1500 | 83.6101  | Russia      | W Siberia, Ordynskoe Dis-<br>trict, Spirino Village env. | O. Kosterin leg.                                     | 16924  | 17071 | OR130042 | OR133862 | D529 |
| <i>Aeshna soneharai</i>                        |         |          | South Korea |                                                          | [18]                                                 |        |       | KF257096 | no data  |      |
| <i>Aeshna soneharai</i>                        |         |          | Japan       |                                                          | [19]                                                 |        |       | no data  | AB706697 |      |
| <i>Aeshna subarctica</i> Walker, 1908          |         |          | Germany     |                                                          | [14]                                                 |        |       | KU180298 | KU180362 |      |
| <i>Aeshna subarctica</i>                       | 52.6400 | 96.8900  | Russia      | Tuva, Lake Saylyg-Khol'                                  | O. Kosterin leg.                                     | 16916  | 17242 | OR130043 | OR133837 | D521 |
| <i>Aeshna subarctica</i>                       | 54.8800 | 83.0484  | Russia      | W Siberia, Novosibirsk                                   | O. Kosterin leg.                                     | 16915  | 17208 | OR130044 | OR133836 | D520 |
| <i>Aeshna subarctica</i>                       |         |          | Italy       |                                                          | [20]                                                 |        |       | MT298250 | no data  |      |
| <i>Aeshna subarctica</i>                       |         |          | Italy       |                                                          | [20]                                                 |        |       | MT298249 | no data  |      |
| <i>Aeshna subarctica</i>                       |         |          | Japan       |                                                          | [19]                                                 |        |       | no data  | AB711410 |      |
| <i>Aeshna subarctica</i>                       |         |          | Finland     |                                                          | [19]                                                 |        |       | no data  | AB711413 |      |
| <i>Aeshna subarctica</i>                       |         |          | Japan       |                                                          | [19]                                                 |        |       | no data  | AB711411 |      |
| <i>Aeshna tuberculifera</i> Walker, 1908       |         |          | Canada      |                                                          | [15]                                                 |        |       | HM413600 | no data  |      |
| <i>Aeshna tuberculifera</i>                    |         |          | Canada      |                                                          | [15]                                                 |        |       | JF839364 | no data  |      |
| <i>Aeshna umbrosa</i> Walker, 1908             |         |          | Canada      |                                                          | [15]                                                 |        |       | GU712955 | no data  |      |
| <i>Aeshna umbrosa</i>                          |         |          | Canada      |                                                          | [15]                                                 |        |       | GU713003 | no data  |      |
| <i>Aeshna vercanica</i> (Schneider et a. 2015) |         |          | Azerbaijan  |                                                          | [14]                                                 |        |       | KU180322 | KU180361 |      |
| <i>Aeshna vercanica</i>                        |         |          | Iran        |                                                          | [14]                                                 |        |       | KU180302 | KU180365 |      |
| <i>Aeshna vercanica</i>                        |         |          | Iran        |                                                          | [14]                                                 |        |       | KU180303 | KU180368 |      |
| <i>Aeshna vercanica</i>                        |         |          | Azerbaijan  | Lenkoran, Azfilial Settle-<br>ment                       | N. Snegovaya leg.                                    | failed | 17092 | no data  | OR133831 | D550 |
| <i>Aeshna vercanica</i>                        |         |          | Azerbaijan  |                                                          | [24]                                                 |        |       | no data  | FN356031 |      |
| <i>Aeshna verticalis</i> Hagen, 1861           |         |          | Canada      |                                                          | [15]                                                 |        |       | HM413554 | no data  |      |

|                                                   |          |                             |         |                                                               |                                    |             |          |          |      |
|---------------------------------------------------|----------|-----------------------------|---------|---------------------------------------------------------------|------------------------------------|-------------|----------|----------|------|
| <i>Aeshna verticalis</i>                          | Canada   |                             |         | [15]                                                          |                                    |             | HM413555 | no data  |      |
| <i>Aeshna viridis</i> Eversmann, 1836             | Germany  |                             |         | [14]                                                          |                                    |             | KU180301 | KU180366 |      |
| <i>Aeshna viridis</i>                             | Germany  |                             |         | [14]                                                          |                                    |             | KU180300 | KU180366 |      |
| <i>Aeshna viridis</i>                             | Germany  |                             |         | [14]                                                          |                                    |             | no data  | KU180387 |      |
| <i>Anaciaeschna jaspidea</i> (Burmeister, 1839)   | India    |                             |         | [15]                                                          |                                    |             | KT879909 | no data  |      |
| <i>Anaciaeschna jaspidea</i>                      | Japan    |                             |         | [19]                                                          |                                    |             | no data  | AB706701 |      |
| <i>Anaciaeschna martini</i> (Selys, 1897)         | Japan    |                             |         | [25]                                                          |                                    |             | LC466165 | LC466157 |      |
| <i>Anaciaeschna martini</i>                       | Nepal    |                             |         | [25]                                                          |                                    |             | LC466163 | LC466154 |      |
| <i>Anaciaeschna martini</i>                       | Japan    |                             |         | [19]                                                          |                                    |             | no data  | AB706702 |      |
| <i>Anaciaeschna triangulifera</i> McLachlan, 1896 | Tanzania |                             |         | [26]                                                          |                                    |             | KC912207 | no data  |      |
| <i>Anax congoliath</i> Fraser, 1953               | Angola   |                             |         | [27]                                                          |                                    |             | KU565906 | no data  |      |
| <i>Anax congoliath</i>                            | Gabon    |                             |         | [27]                                                          |                                    |             | KU565907 | no data  |      |
| <i>Anax ephippiger</i> (Burmeister, 1839)         | Italy    |                             |         | [20]                                                          |                                    |             | MT298252 | no data  |      |
| <i>Anax ephippiger</i>                            | Italy    |                             |         | [20]                                                          |                                    |             | MT298251 | no data  |      |
| <i>Anax ephippiger</i>                            | Israel   | Jordan Valley, near Had Nes |         |                                                               | A. Leirich leg. coll. T. Schneider | 16019 16085 | OR130045 | OR133824 | D417 |
| <i>Anax ephippiger</i>                            | Tanzania |                             |         | [19]                                                          |                                    |             | no data  | AB706703 |      |
| <i>Anax ephippiger</i>                            | Japan    |                             |         | [28]                                                          |                                    |             | no data  | LC511177 |      |
| <i>Anax ephippiger</i>                            | Cameroon |                             |         | [24]                                                          |                                    |             | no data  | FN356093 |      |
| <i>Anax gibbosulus</i> Rambur, 1842               | Samoa    |                             |         | [13]                                                          |                                    |             | MW810906 | no data  |      |
| <i>Anax gladiator</i> Dijkstra & Kipping, 2015    | Zambia   |                             |         | [27]                                                          |                                    |             | KU565911 | no data  |      |
| <i>Anax gladiator</i>                             | Congo    |                             |         | [27]                                                          |                                    |             | KU565913 | no data  |      |
| <i>Anax guttatus</i> (Burmeister, 1839)           | Japan    |                             |         | [19]                                                          |                                    |             | no data  | AB706704 |      |
| <i>Anax guttatus</i>                              | Borneo   |                             |         | [13]                                                          |                                    |             | MW810901 | no data  |      |
| <i>Anax immaculifrons</i> Rambur, 1842            | India    |                             |         | [15]                                                          |                                    |             | MG544869 | no data  |      |
| <i>Anax immaculifrons</i>                         | Lebanon  |                             |         |                                                               | T. Schneider leg.                  | 17502 17507 | OR346685 | OR350846 | D589 |
| <i>Anax imperator</i> Leach in Brewster, 1815     | Liberia  |                             |         | [27]                                                          |                                    |             | KU565916 | no data  |      |
| <i>Anax imperator</i>                             | Germany  | Brandenburg                 |         |                                                               | T. Schneider leg.                  | 16258 16265 | OR130046 | OR133816 | D443 |
| <i>Anax imperator</i>                             | Germany  | Brandenburg                 |         |                                                               | T. Schneider leg.                  | 16259 16266 | OR130047 | OR133817 | D444 |
| <i>Anax junius</i> (Drury, 1773)                  | USA      |                             |         | [29]                                                          |                                    |             | AY555548 | no data  |      |
| <i>Anax junius</i>                                | USA      |                             |         | [15]                                                          |                                    |             | HQ986154 | no data  |      |
| <i>Anax junius</i>                                | USA      |                             |         | [30]                                                          |                                    |             | no data  | LC366224 |      |
| <i>Anax junius</i>                                | USA      |                             |         | [30]                                                          |                                    |             | no data  | LC366223 |      |
| <i>Anax julius</i> Brauer, 1865                   | 45.2200  | 133.5130                    | Russia  | Primorye, Kirovskiy District, Gornye Klyuchi Village env.     | O. Kosterin leg.                   | 16898 17045 | OR130048 | OR133818 | D503 |
| <i>Anax julius</i>                                | 45.0600  | 131.9900                    | Russia  | Primorye, Khanka District, Platono-Aleksandrovka Village env. | O. Kosterin leg.                   | 16899 17046 | OR130049 | OR133820 | D504 |
| <i>Anax julius</i>                                |          |                             | Vietnam | Yen Bai                                                       | Dang leg. coll. T. Schneider       | 16971 17245 | OR130051 | OR133821 | D556 |

|                                                   |          |          |              |               |                                       |        |        |          |          |      |
|---------------------------------------------------|----------|----------|--------------|---------------|---------------------------------------|--------|--------|----------|----------|------|
| <i>Anax julius</i>                                |          |          | Vietnam      | Yen Bai       | Dang leg.<br>coll. T. Schneider       | 16950  | 17097  | OR130050 | OR133819 | D555 |
| <i>Anax julius</i>                                |          |          | Japan        |               | [19]                                  |        |        | no data  | AB706711 |      |
| <i>Anax julius</i>                                |          |          | Japan        |               | [19]                                  |        |        | no data  | AB706713 |      |
| <i>Anax nigrofasciatus</i> Oguma, 1915            |          |          | Korea        |               | [15]                                  |        |        | MN609590 | no data  |      |
| <i>Anax nigrofasciatus</i>                        |          |          | Korea        |               | [15]                                  |        |        | MN609591 | no data  |      |
| <i>Anax nigrofasciatus</i>                        |          |          | Vietnam      | Sa Pa         | Dang leg.<br>coll. T. Schneider       | 16952  | 17246  | OR130052 | OR133823 | D557 |
| <i>Anax panybeus</i> Hagen, 1867                  |          |          | Japan        |               | [19]                                  |        |        | no data  | AB706710 |      |
| <i>Anax panybeus</i>                              |          |          | Japan        |               | [19]                                  |        |        | no data  | AB706709 |      |
| <i>Anax parthenope</i> (Selys, 1839)              |          |          | Poland       |               | [31]                                  |        |        | MN701501 | no data  |      |
| <i>Anax parthenope</i>                            |          |          | Poland       |               | [31]                                  |        |        | MN701506 | no data  |      |
| <i>Anax parthenope</i>                            |          |          | Germany      | Brandenburg   | T. Schneider leg.                     | 16314  | 16353  | OR130053 | OR133822 | D450 |
| <i>Anax piraticus</i> Kennedy, 1934               |          |          | Guam         |               | [30]                                  |        |        | no data  | LC366251 |      |
| <i>Anax rutherfordi</i> McLachlan, 1883           |          |          | Liberia      |               | [27]                                  |        |        | KU565918 | no data  |      |
| <i>Anax rutherfordi</i>                           |          |          | Liberia      |               | [27]                                  |        |        | KU565917 | no data  |      |
| <i>Anax speratus</i> Hagen, 1867                  |          |          | Congo        |               | [27]                                  |        |        | KU565921 | no data  |      |
| <i>Anax speratus</i>                              |          |          | South Africa |               | [27]                                  |        |        | KU565923 | no data  |      |
| <i>Anax tristis</i> Hagen, 1867                   |          |          | Congo        |               | [27]                                  |        |        | KU565931 | no data  |      |
| <i>Anax walsinghami</i> McLachlan, 1883           |          |          | USA          | Utha          | [13]                                  |        |        | MW810898 | no data  |      |
| <i>Anax walsinghami</i>                           |          |          | USA          | California    | [13]                                  |        |        | MW810942 | no data  |      |
| <i>Andaeschna occidentalis</i> Bota-Sierra, 2019  |          |          | Colombia     |               | C.A.Bota-Sierra leg.                  | 17499  | 17500  | OR346684 | OR350845 | D588 |
| <i>Austrogynacantha heterogena</i> Tillyard, 1908 | -19.2828 | 146.8010 | Australia    | Queensland    | [15]                                  |        |        | HQ986475 | no data  |      |
| <i>Austrogynacantha heterogena</i>                |          |          | Australia    | Queensland    | Australian Museum<br>(D. Smith)       | 17230  | 17131  | OR130054 | OR133872 | D567 |
| <i>Basiaeschna janata</i> (Say, 1840)             |          |          | Canada       |               | [15]                                  |        |        | GU712962 | no data  |      |
| <i>Basiaeschna janata</i>                         | 40.9100  | -73.7300 | USA          | New York      | [15]                                  |        |        | MT947635 | no data  |      |
| <i>Basiaeschna janata</i>                         |          |          | Canada       |               | [15]                                  |        |        | JN419315 | no data  |      |
| <i>Boyeria cretensis</i> Peters, 1991             |          |          | Greece       | Crete, Zakros | A. Martens leg.                       | 17371  | 17102  | OR130055 | OR133883 | D560 |
| <i>Boyeria grafiana</i> Williamson, 1907          |          |          | Canada       |               | [15]                                  |        |        | GU713103 | no data  |      |
| <i>Boyeria grafiana</i>                           |          |          | Canada       |               | [15]                                  |        |        | JN419353 | no data  |      |
| <i>Boyeria irene</i> (Fonscolombe, 1838)          |          |          | Italy        |               | [20]                                  |        |        | MT298265 | no data  |      |
| <i>Boyeria irene</i>                              |          |          | Italy        |               | [20]                                  |        |        | MT298267 | no data  |      |
| <i>Boyeria irene</i>                              |          |          | France       |               | [24]                                  |        |        | no data  | FN356042 |      |
| <i>Boyeria irene</i>                              |          |          | France       |               | [16]                                  |        |        | MW490313 | no data  |      |
| <i>Boyeria irene</i>                              |          |          | Switzerland  | Ennetburgen   | S. Kohl leg.                          | 16820  | 16598  | OR130057 | OR133881 | D482 |
| <i>Boyeria irene</i>                              |          |          | Switzerland  | Ennetburgen   | S. Kohl leg.                          | 16817  | failed | OR130056 | no data  | D483 |
| <i>Boyeria irene</i>                              |          |          | Germany      | Lower Saxon   | F. Suhling leg.<br>coll. T. Schneider | failed | 17093  | no data  | OR133880 | D551 |
| <i>Boyeria irene</i>                              |          |          | Italy        | Calabria      | T. Schneider leg.                     | failed | 16125  | no data  | OR133882 | D418 |
| <i>Boyeria karubei</i> Yokoi, 2002                |          |          | Vietnam      |               | [32]                                  |        |        | no data  | LC612603 |      |
| <i>Boyeria maclachlani</i> (Selys, 1883)          |          |          | Japan        |               | [19]                                  |        |        | no data  | AB706723 |      |

|                                                           |         |          |                                   |                                                              |                                         |        |        |          |          |      |
|-----------------------------------------------------------|---------|----------|-----------------------------------|--------------------------------------------------------------|-----------------------------------------|--------|--------|----------|----------|------|
| <i>Boyeria vinosa</i> (Say, 1840)                         |         |          | Canada                            |                                                              | [15]                                    |        |        | HM395246 | no data  |      |
| <i>Brachytron pratense</i> (Müller, 1764)                 |         |          | Italy                             |                                                              | [20]                                    |        |        | MT298272 | no data  |      |
| <i>Brachytron pratense</i>                                |         |          | Italy                             |                                                              | [20]                                    |        |        | MT298273 | no data  |      |
| <i>Brachytron pratense</i>                                | 44.7300 | 37.4600  | Russia                            | W Caucasus,<br>Abrau Peninsula,<br>Malyy Utrish Village env. | O. Kosterin leg.                        | 16901  | 17048  | OR130061 | OR133896 | D506 |
| <i>Brachytron pratense</i>                                | 44.7300 | 37.4600  | Russia                            | W Caucasus,<br>Abrau Peninsula,<br>Malyy Utrish Village env. | O. Kosterin leg.                        | 16900  | 17047  | OR130060 | OR133895 | D505 |
| <i>Brachytron pratense</i>                                |         |          | Germany                           | Potsdam                                                      | T. Schneider leg.                       | 16263  | 16270  | OR130059 | OR133894 | D448 |
| <i>Brachytron pratense</i>                                |         |          | Germany                           | Potsdam                                                      | T. Schneider leg.                       | 16263  | 16270  | OR130059 | OR133894 | D448 |
| <i>Brachytron pratense</i>                                |         |          | Azerbaijan                        | Lenkoran, Azfilial Settle-<br>ment                           | N. Snegovaya leg.                       | failed | 17243  | no data  | OR133897 | D549 |
| <i>Caliaeschna microstigma</i> (Schneider, 1845)          |         |          | Montenegro                        |                                                              | [20]                                    |        |        | MT298276 | no data  |      |
| <i>Caliaeschna microstigma</i>                            |         |          | Lebanon                           | Bared Brook                                                  | T. Schneider leg.                       | 16264  | 16271  | OR130064 | OR133889 | D449 |
| <i>Caliaeschna microstigma</i>                            |         |          | Azerbaijan                        | Balaken District, Djidjikhana                                | N. Snegovaya leg.<br>coll. T. Schneider | 16182  | 16161  | OR130063 | OR133888 | D435 |
| <i>Caliaeschna microstigma</i>                            |         |          | Azerbaijan                        | Ordubad District, Agdere                                     | N. Snegovaya leg.<br>coll. T. Schneider | 16151  | 16160  | OR130062 | OR133887 | D434 |
| <i>Cephalaeschna risi</i> Asahina, 1981                   |         |          | Taiwan                            | Qilan, Yilan Co.                                             | Fang-Shuo Hu leg.                       | 16322  | failed | OR130065 | no data  | D458 |
| <i>Cephalaeschna risi</i>                                 |         |          | Taiwan                            |                                                              | Fang-Shuo Hu leg.                       | 16324  | 16853  | OR130066 | OR133931 | D460 |
| <i>Coryphaeschna adnexa</i> (Hagen, 1861)                 |         |          | Bolivia                           | Nuflo de Chavez, San Jul-<br>ian                             | [15]                                    |        |        | MN345399 | no data  |      |
| <i>Epiaeschna heros</i> (Fabricius, 1798)                 |         |          | USA                               | Virginia                                                     | [15]                                    |        |        | MN345091 | no data  |      |
| <i>Gynacantha africana</i><br>(Palisot de Beauvois, 1807) |         |          | Liberia                           | Grand Bassa County                                           | [27]                                    |        |        | KU566102 | no data  |      |
| <i>Gynacantha bayadera</i> Selys, 1892                    | 13.6000 | 105.9300 | Cambodia                          | Stung Treng Province, Srae<br>Ruessei Village env.           | O. Kosterin leg.                        | 17311  | 17327  | OR130067 | OR133874 | D576 |
| <i>Gynacantha bispina</i> Rambur, 1842                    |         |          | Mauritius                         |                                                              | [27]                                    |        |        | KU566103 | no data  |      |
| <i>Gynacantha bullata</i> Karsch, 1891                    |         |          | Democratic<br>Republic Con-<br>go | Kisangani                                                    | [27]                                    |        |        | KU566105 | no data  |      |
| <i>Gynacantha bullata</i>                                 |         |          | Cameroon                          |                                                              | [24]                                    |        |        | no data  | FN356092 |      |
| <i>Gynacantha congolica</i> Dijkstra, 2015                |         |          | Democratic<br>Republic Con-<br>go | Orientele                                                    | [27]                                    |        |        | KU566118 | no data  |      |
| <i>Gynacantha demeter</i> Ris, 1911                       | 10.5240 | 103.7130 | Cambodia                          | Preah Sihanouk Province,<br>Ream Peninsula                   | O. Kosterin leg.                        | 17312  | 17328  | OR130068 | OR133873 | D577 |
| <i>Gynacantha dravida</i> Lieftinck, 1960                 |         |          | India                             |                                                              | [15]                                    |        |        | MK990607 | no data  |      |
| <i>Gynacantha hyalina</i> Selys, 1882                     | 25.2643 | 121.5840 | Taiwan                            | New Taipei, Aliban Ecologi-<br>cal Farm                      | C. H. Ma & I. L. leg.<br>Lee            | 17478  | 17482  | OR130069 | OR133877 | D584 |
| <i>Gynacantha japonica</i> Bartenev, 1910                 |         |          | Korea                             |                                                              | [18]                                    |        |        | KF257090 | no data  |      |
| <i>Gynacantha japonica</i>                                |         |          | Japan                             |                                                              | [19]                                    |        |        | no data  | AB706724 |      |
| <i>Gynacantha manderica</i> Grünberg, 1902                |         |          | South Africa                      |                                                              | [27]                                    |        |        | KU566119 | no data  |      |

|                                                      |         |          |                           |                                                 |                              |        |        |          |          |      |
|------------------------------------------------------|---------|----------|---------------------------|-------------------------------------------------|------------------------------|--------|--------|----------|----------|------|
| <i>Gynacantha nigeriensis</i> (Gambles, 1956)        |         |          | Uganda                    |                                                 | [27]                         |        |        | KU566123 | no data  |      |
| <i>Gynacantha pupillata</i> Dijkstra, 2015           |         |          | Democratic Republic Congo | Orientale                                       | [27]                         |        |        | KU566133 | no data  |      |
| <i>Gynacantha ryukyuensis</i> Asahina, 1962          |         |          | Japan                     |                                                 | [19]                         |        |        | no data  | AB706729 |      |
| <i>Gynacantha saltatrix</i> Martin, 1909             | 13.6000 | 105.9300 | Cambodia                  | Stung Treng Province, Srae Ruessei Village env. | O. Kosterin leg.             | 17313  | failed | OR130070 | no data  | D578 |
| <i>Gynacantha subinterrupta</i> Rambur, 1842         | 10.5010 | 193.7220 | Cambodia                  | Preah Sihanouk Province, Ream Peninsula         | O. Kosterin leg.             | 17314  | 17330  | OR130071 | OR133875 | D579 |
| <i>Gynacantha subinterrupta</i>                      |         |          | Vietnam                   | Bao Loc, Lam Dong                               | Dang leg. coll. T. Schneider | 16949  | failed | OR130072 | no data  | D554 |
| <i>Gynacantha usambarica</i> Sjöstedt, 1909          |         |          | Liberia                   |                                                 | [27]                         |        |        | KU566134 | no data  |      |
| <i>Gynacantha vesiculata</i> Karsch, 1891            |         |          | Liberia                   |                                                 | [27]                         |        |        | KU566139 | no data  |      |
| <i>Heliaeschna crassa</i> Krüger, 1899               | 11.5810 | 103.1280 | Cambodia                  | Koh Kong Province, Tatai Commune                | G. Chartier leg.             | failed | 17332  | no data  | OR133878 | D581 |
| <i>Indaeschna grubaueri</i> (Förster, 1904)          |         |          | Indonesia                 | Kalimantan                                      | coll. T. Schneider           | 16953  | failed | OR130073 | no data  | D558 |
| <i>Nasiaeschna pentacantha</i> (Rambur, 1842)        | 37.8667 | -76.8000 | USA                       | Virginia                                        | [15]                         |        |        | MN345309 | no data  |      |
| <i>Oploniaeschna armata</i> (Hagen, 1861)            |         |          | Mexico                    |                                                 | [15]                         |        |        | MN345104 | no data  |      |
| <i>Oploniaeschna armata</i>                          |         |          | Mexico                    | Oaxaca                                          | [15]                         |        |        | MN346016 | no data  |      |
| <i>Periaeschna magdalena</i> Martin, 1909            |         |          | Taiwan                    | New Taipei City                                 | C. H. Ma leg.                | 16897  | 17044  | OR130074 | OR133890 | D502 |
| <i>Periaeschna magdalena</i>                         |         |          | Vietnam                   |                                                 | Dang leg. coll. T. Schneider | 17232  | 17237  | OR130075 | OR133891 | D569 |
| <i>Pinheyschna subpupillata</i> (McLachlan, 1896)    |         |          | South Africa              |                                                 | [15]                         |        |        | AF429287 | no data  |      |
| <i>Pinheyschna yemenensis</i> (Waterston, 1985)      |         |          | Saudi Arabia              | Soudah Waterfall                                | M. Waldhauser leg.           | 17026  | 17107  | OR130076 | OR133871 | D565 |
| <i>Planaeschna asahinai</i> Karube, 2011             |         |          | Vietnam                   |                                                 | [32]                         |        |        | LC612707 | no data  |      |
| <i>Planaeschna celia</i> Wilson & Reels, 2001        |         |          | Vietnam                   |                                                 | [32]                         |        |        | LC612709 | no data  |      |
| <i>Planaeschna cucphuongensis</i> Karube, 1999       |         |          | Vietnam                   |                                                 | [32]                         |        |        | no data  | LC612627 |      |
| <i>Planaeschna cucphuongensis</i>                    |         |          | Vietnam                   |                                                 | Dang leg. coll. T. Schneider | 17233  | 17238  | OR130077 | OR133885 | D570 |
| <i>Planaeschna milnei</i> (Selys, 1883)              |         |          | Japan                     |                                                 | [19]                         |        |        | AB708630 | AB706740 |      |
| <i>Planaeschna risi</i> Asahina, 1964                |         |          | Japan                     |                                                 | [19]                         |        |        | AB708637 | AB706742 |      |
| <i>Planaeschna risi</i>                              | 24.8804 | 121.6645 | Taiwan                    | New Taipei, Jingualio                           | Fang-Shuo Hu leg.            | 17495  | 17484  | OR130079 | OR133884 | D586 |
| <i>Planaeschna taiwana</i> Asahina, 1951             |         |          | Taiwan                    |                                                 | [19]                         |        |        | no data  | AB706746 |      |
| <i>Planaeschna tamdaoensis</i> Asahina, 1996         |         |          | Vietnam                   |                                                 | [32]                         |        |        | LC612720 | LC612639 |      |
| <i>Planaeschna tomokunii</i> Asahina, 1996           |         |          | Vietnam                   |                                                 | [32]                         |        |        | no data  | LC612643 |      |
| <i>Planaeschna ishigakiana</i> Asahina, 1951         |         |          | Taiwan                    |                                                 | [30]                         |        |        | no data  | LC366218 |      |
| <i>Planaeschna ishigakiana</i>                       |         |          | Vietnam                   |                                                 | [32]                         |        |        | no data  | LC612631 |      |
| <i>Planaeschna ishigakiana</i>                       | 24.7499 | 121.5585 | Taiwan                    | New Taipei, Fushan                              | Fang-Shuo Hu leg.            | 17481  | 17485  | OR130078 | OR133886 | D587 |
| <i>Planaeschna viridis</i> Karube, 2004              |         |          | Vietnam                   |                                                 | [32]                         |        |        | no data  | LC612644 |      |
| <i>Polycanthagyna erythromelas</i> (McLachlan, 1896) | 12.3860 | 103.0550 | Cambodia                  | Pursat Province, Phnom Tumpor Mt                | O. Kosterin leg.             | 17310  | 17326  | OR130080 | OR133870 | D575 |
| <i>Polycanthagyna melanicta</i> (Selys, 1883)        |         |          | Korea                     |                                                 | [18]                         |        |        | KF257100 | no data  |      |
| <i>Polycanthagyna melanicta</i>                      |         |          | Japan                     |                                                 | [30]                         |        |        | no data  | LC366042 |      |
| <i>Polycanthagyna melanicta</i>                      |         |          | Japan                     |                                                 | [19]                         |        |        | no data  | AB706747 |      |



|                                                      |          |          |                       |                                                |                                       |        |        |          |          |      |
|------------------------------------------------------|----------|----------|-----------------------|------------------------------------------------|---------------------------------------|--------|--------|----------|----------|------|
| <i>Polycanthagyna melanictera</i>                    |          |          | Japan                 |                                                | [19]                                  |        |        | no data  | AB706748 |      |
| <i>Remartinia luteipennis</i> (Burmeister, 1839)     |          |          | Panama                |                                                | [15]                                  |        |        | MN344834 | no data  |      |
| <i>Rhionaeschna californica</i> (Calvert, 1895)      |          |          | Canada                |                                                | [15]                                  |        |        | JF839371 | no data  |      |
| <i>Rhioaeschna diffinis</i> (Rambur, 1842)           |          |          | Chile                 | Parc National Le Campenie,<br>Cajan Grande     | Ch. Pineda leg.<br>coll. T. Schneider | 17234  | 17239  | OR130081 | OR133879 | D571 |
| <i>Rhionaeschna multicolor</i> (Hagen, 1861)         |          |          | Canada                |                                                | [15]                                  |        |        | JF839373 | no data  |      |
| <i>Sarasaeschna kunigamiensis</i> (Ishida, 1972)     |          |          | Japan                 |                                                | [19]                                  |        |        | no data  | AB706753 |      |
| <i>Sarasaeschna kunigamiensis</i>                    |          |          | Japan                 |                                                | [19]                                  |        |        | AB708646 | no data  |      |
| <i>Sarasaeschna lienii</i> (Yeh & Chen, 2000)        |          |          | Taiwan                |                                                | [19]                                  |        |        | AB708649 | no data  |      |
| <i>Sarasaeschna lienii</i>                           |          |          | Taiwan                | Yilan Co., Yunshan Town-<br>ship               | Fang-Shuo Hu leg.                     | 17260  | failed | OR130082 | no data  | D501 |
| <i>Sarasaeschna lienii</i>                           |          |          | Taiwan                |                                                | [19]                                  |        |        | no data  | AB706754 |      |
| <i>Sarasaeschna pryleri</i> (Martin, 1909)           |          |          | Japan                 |                                                | [19]                                  |        |        | no data  | AB706755 |      |
| <i>Sarasaeschna pryleri</i>                          |          |          | Japan                 |                                                | [19]                                  |        |        | AB708650 | no data  |      |
| <i>Sarasaeschna tsaopiensis</i> (Yeh & Chen, 2000)   |          |          | Taiwan                | Yilan Co., Yunshan Town-<br>ship               | Fang-Shuo Hu leg.                     | failed | 17042  | no data  | OR133900 | D500 |
| <i>Staurophlebia reticulata</i> (Burmeister, 1839)   | -12.8833 | -71.2333 | Peru                  | Madre de Dios                                  | [15]                                  |        |        | MN343860 | no data  |      |
| <i>Tetracanthagyna plagiata</i> (Waterhouse, 1877)   |          |          | Malaysia              |                                                | [15]                                  |        |        | no data  | AB706758 |      |
| <i>Tetracanthagyna waterhousei</i> McLachlan, 1898   | 12.5700  | 107.4150 | Cambodia              | Mondulkiri Province, at Buu<br>Sraa Waterfalls | O. Kosterin leg.                      | 17309  | failed | OR130083 | no data  | D574 |
| <i>Tetracanthagyna waterhousei</i>                   |          |          | Vietnam               | Bao Loc, Lam Dong                              | Dang leg.<br>coll. T. Schneider       | 17282  | failed | OR130085 | no data  | D553 |
| <i>Tetracanthagyna waterhousei</i>                   |          |          | Vietnam               | Bao Loc, Lam Dong                              | Dang leg.<br>coll. T. Schneider       | 17231  | 17236  | OR130084 | OR133892 | D568 |
| <i>Triacanthagyna septima</i> (Selys in Sagra, 1857) |          |          | Dominican<br>Republic | Santiago                                       | [15]                                  |        |        | MN345267 | no data  |      |
