# Supplementary figures and images for: Molecular Phylogeny of Holarctic Aeshnidae with a Focus on the West Palaearctic and Some Remarks on Its Genera Worldwide (Aeshnidae, Odonata)
Source: MDPI journal article supplement (doi:10.3390/d15090950), 2023-08-23

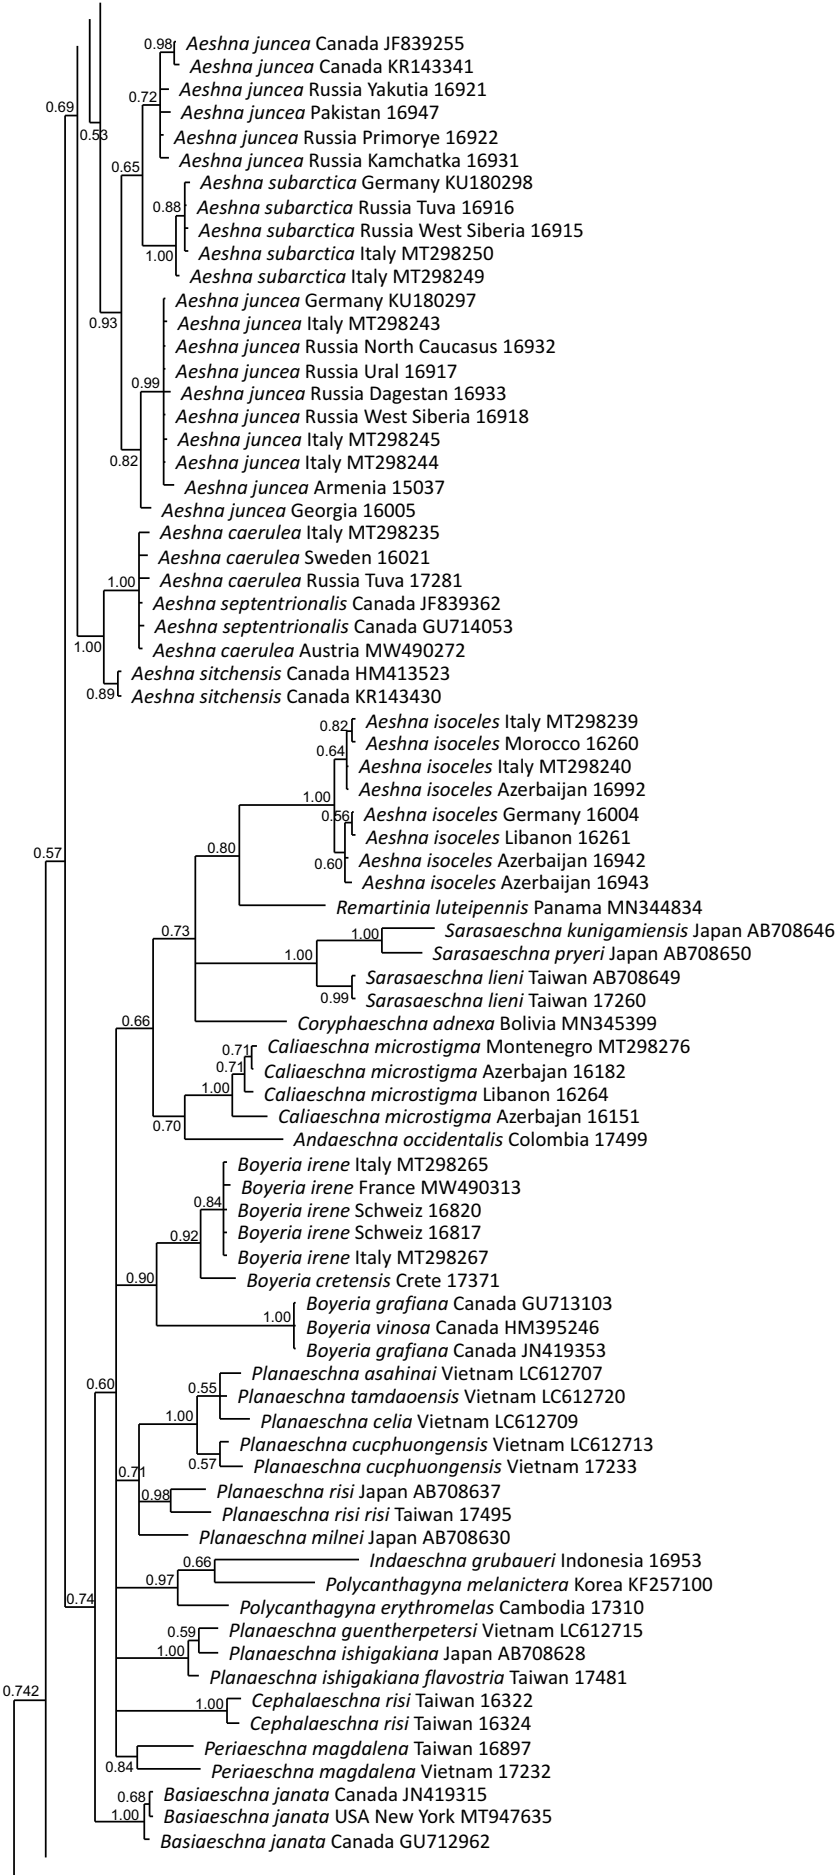

Supplement: s1 [file s1]

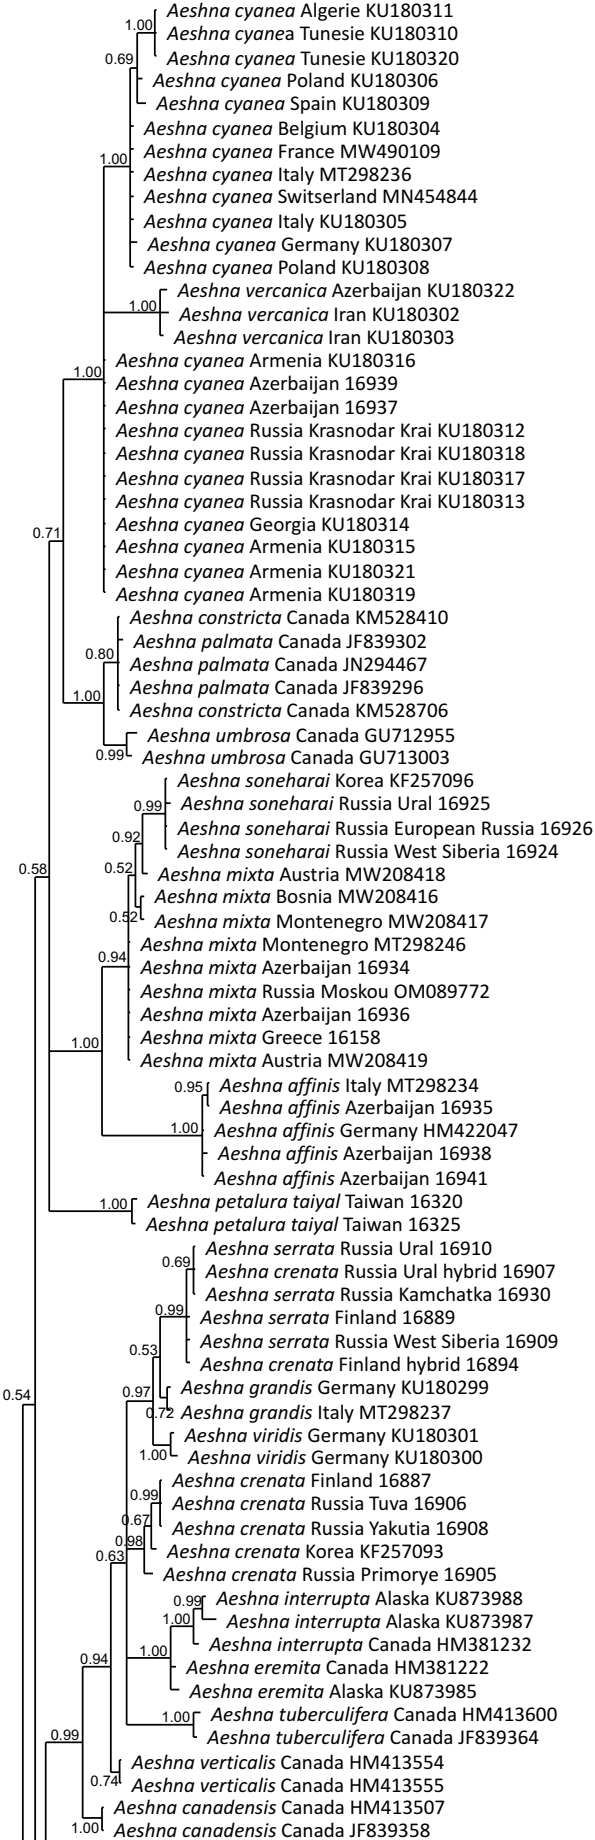

Supplement: s1 [file s1]

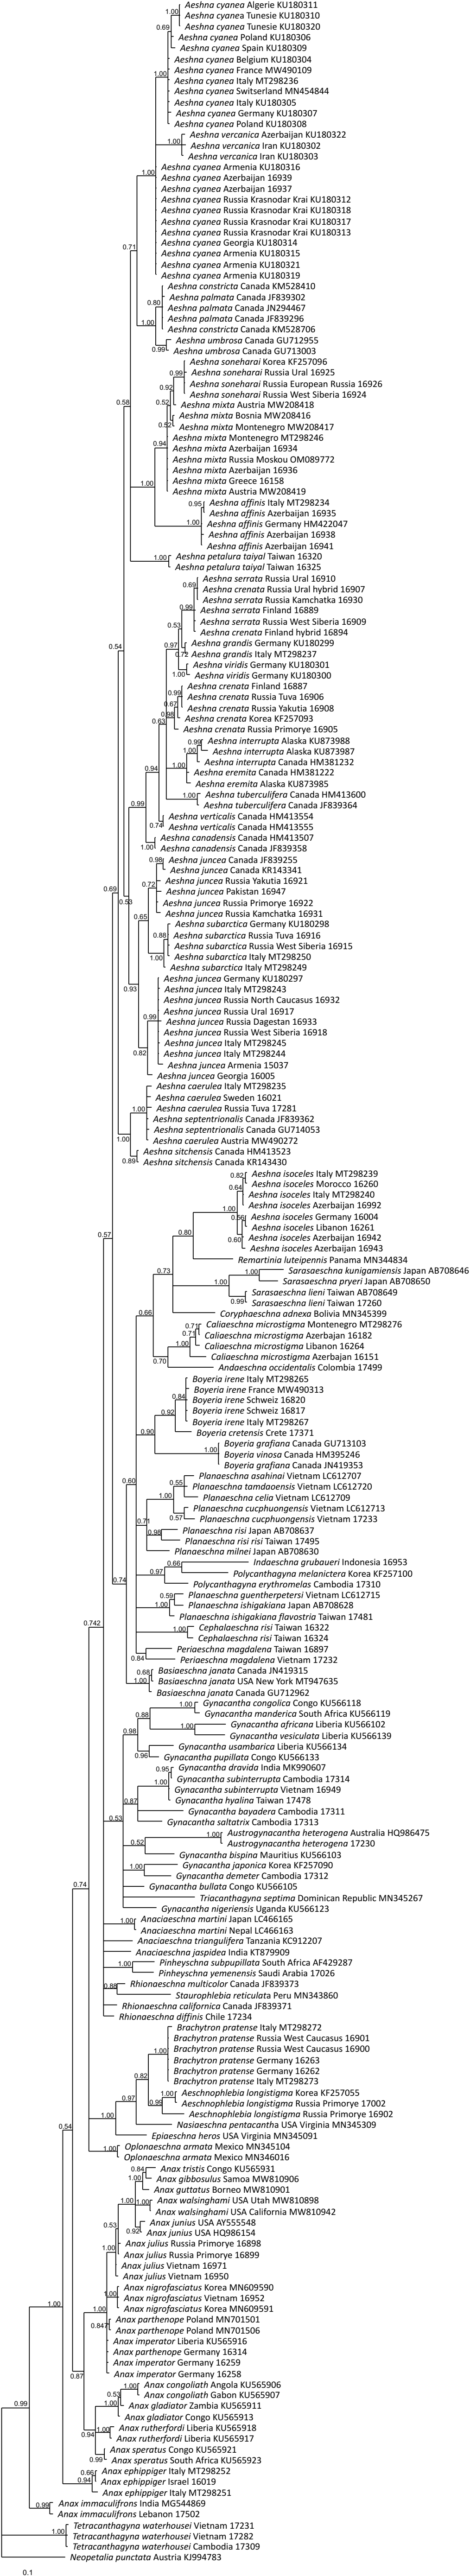

Supplement: s1 [file s1]

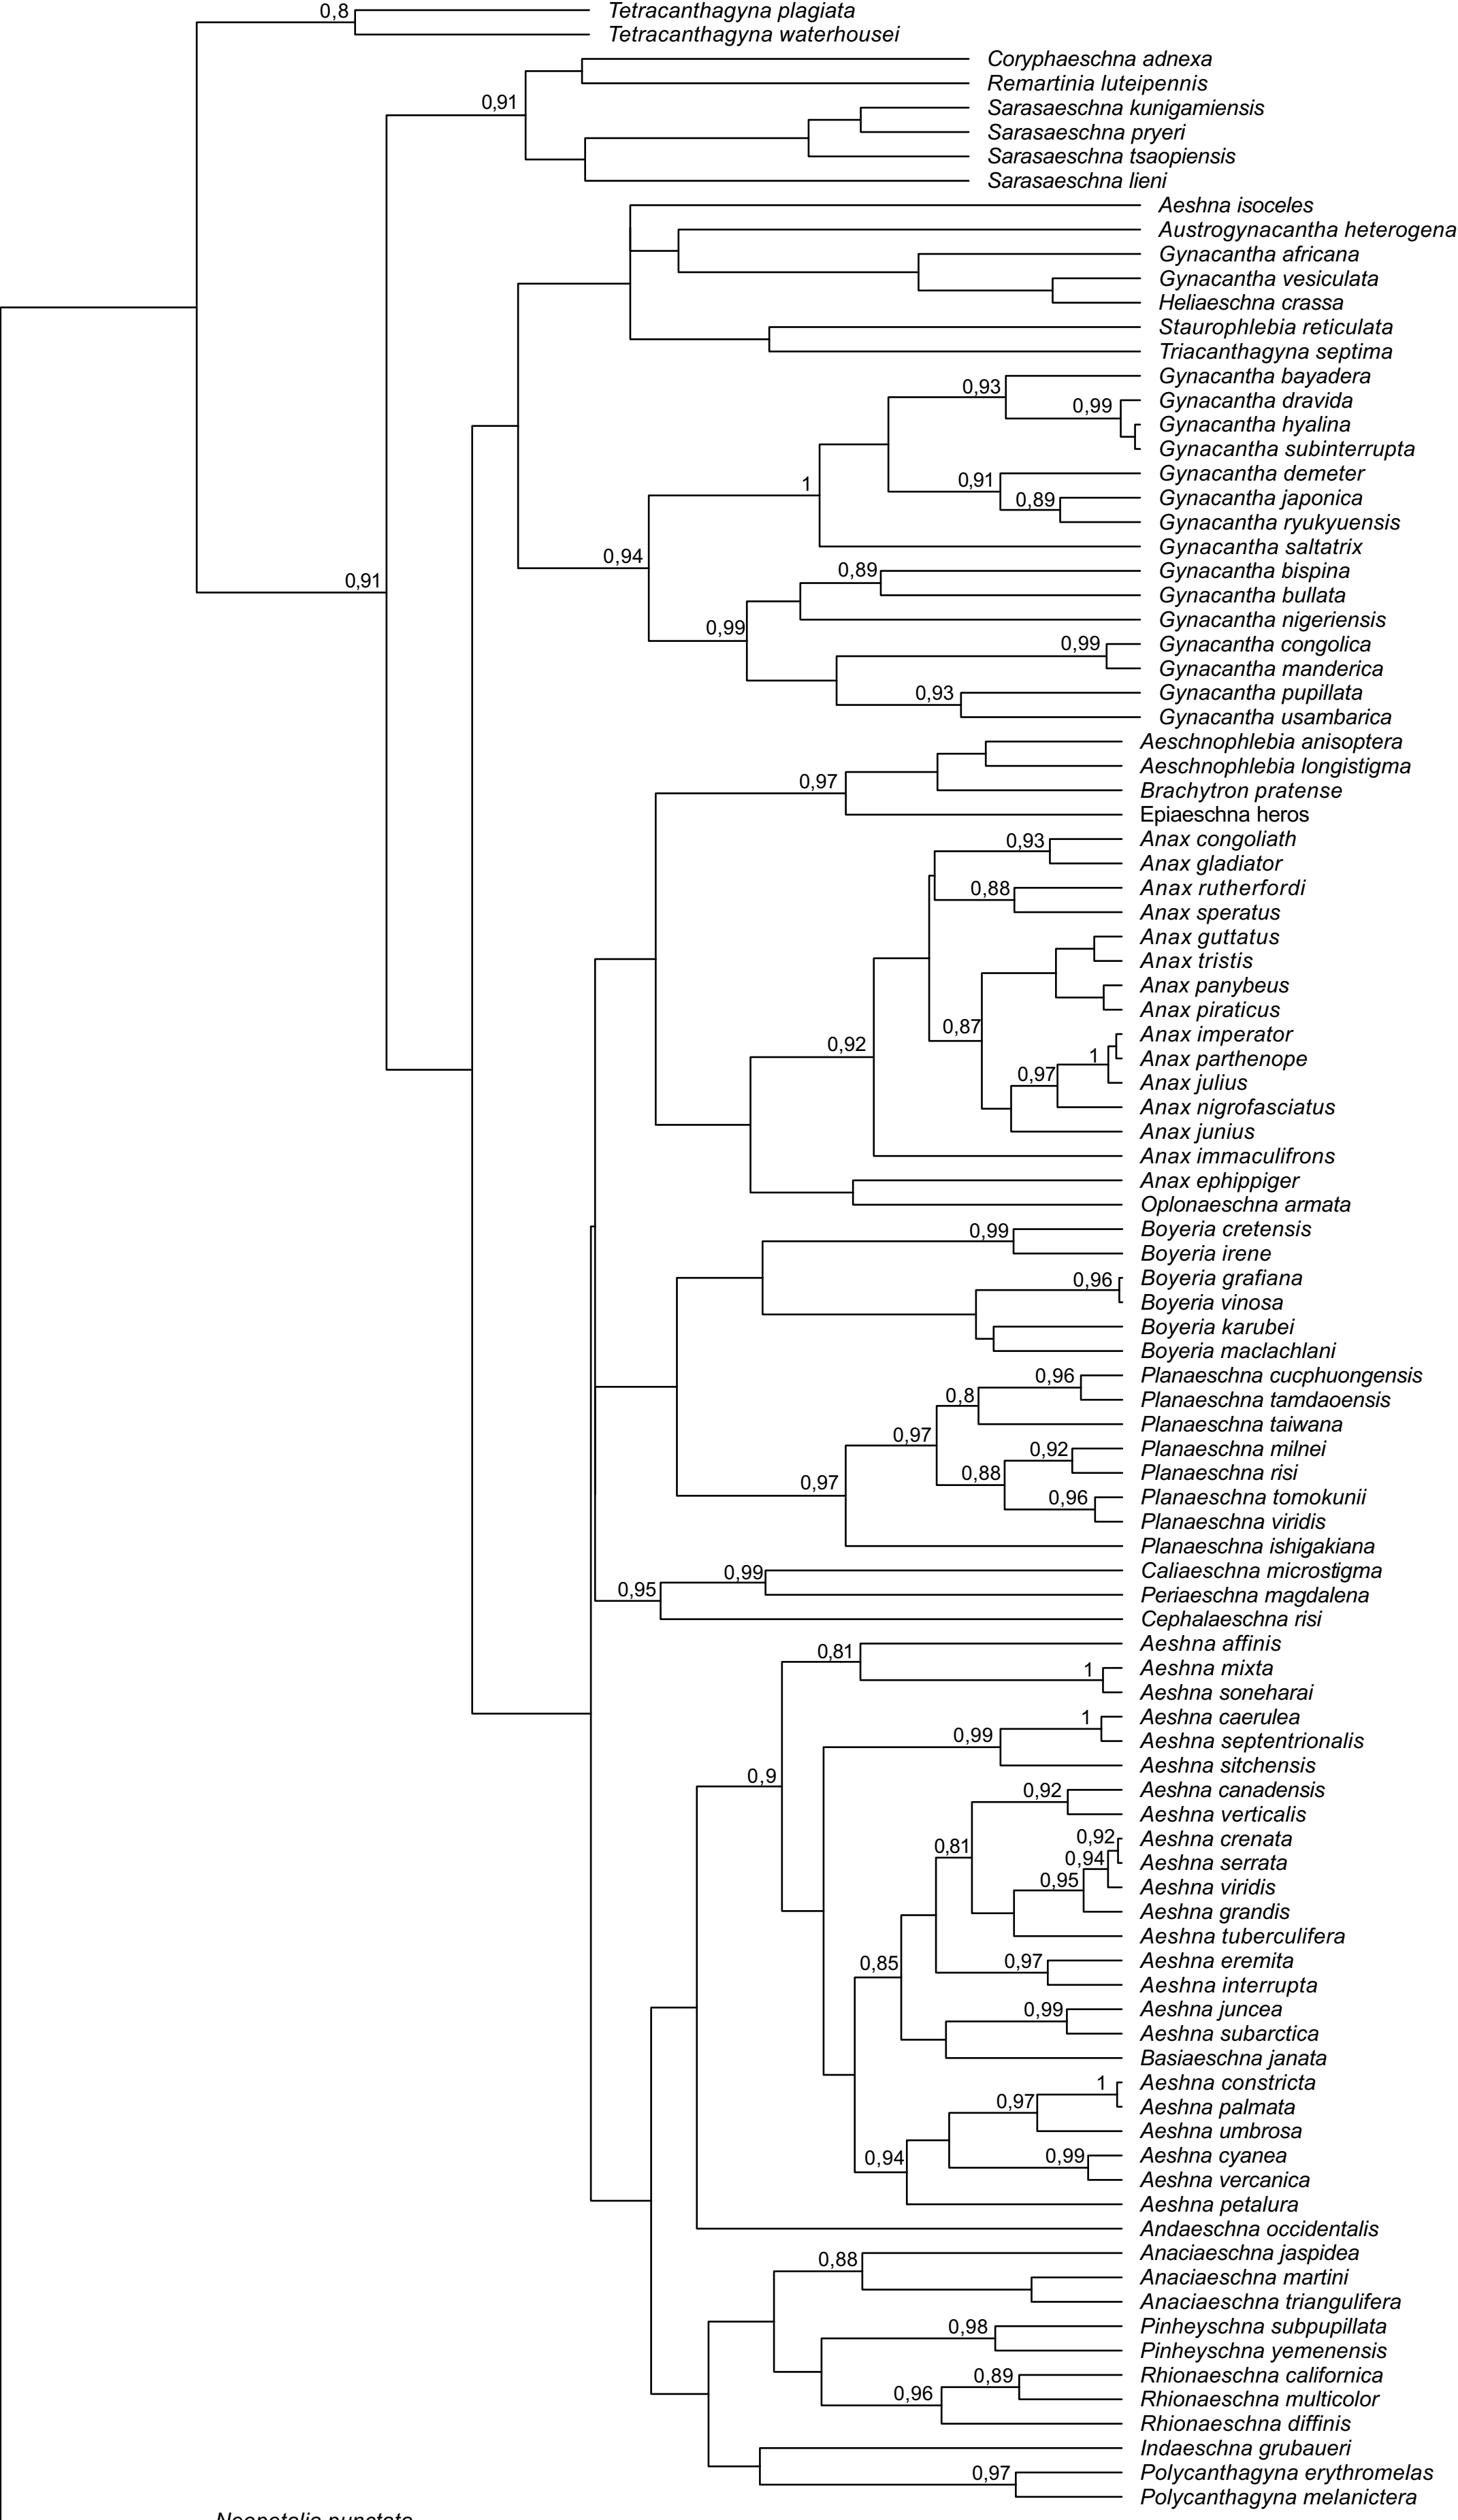

0.02

Supplement: s1 [file s1]

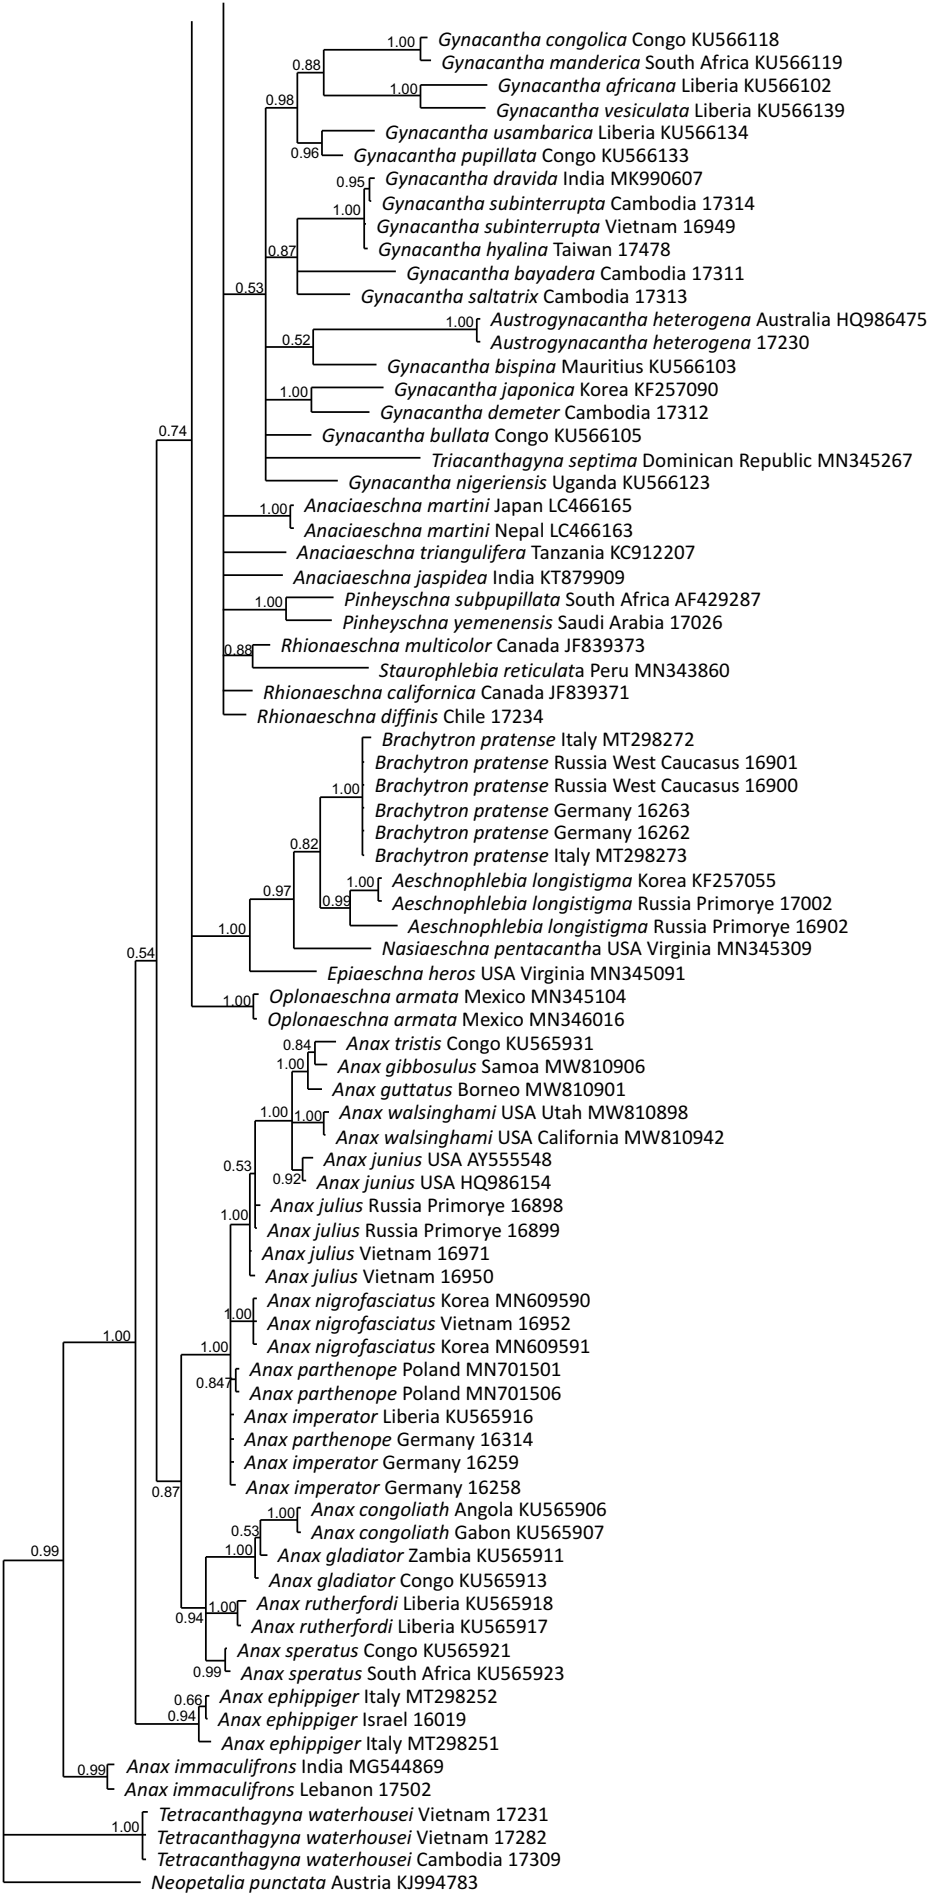

Supplement: s1 [file s1]
